# Supplementary material for: Whole chromosome loss and genomic instability in mouse embryos after CRISPR-Cas9 genome editing
Source: PubMed Central journal article supplement (PMC8494802; doi:10.1038/s41467-021-26097-y), 2021-10-06
Supplement: 41467_2021_26097_MOESM1_ESM.pdf [file 41467_2021_26097_MOESM1_ESM.pdf]

Supplementary Figure 1

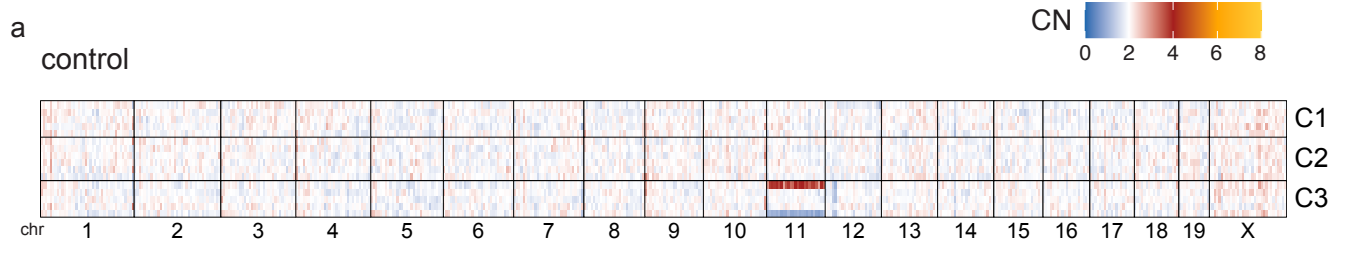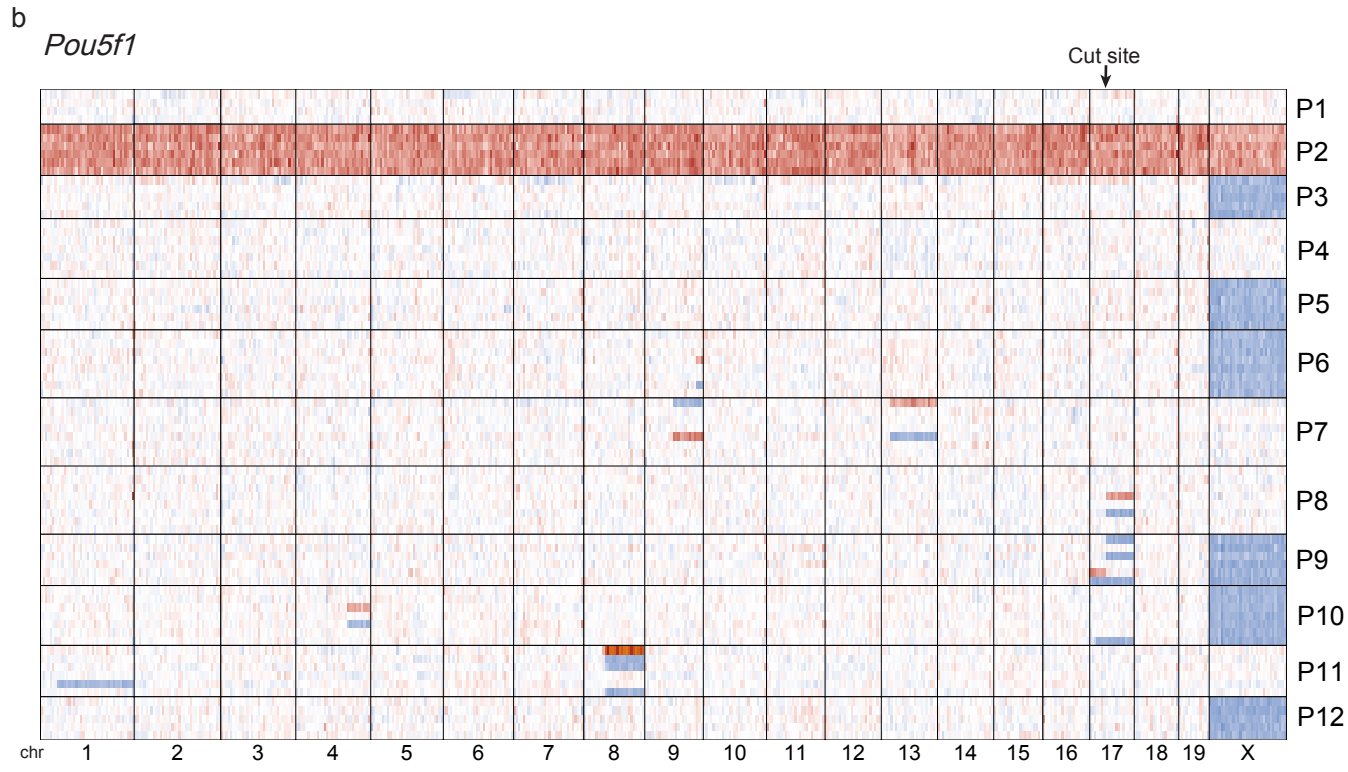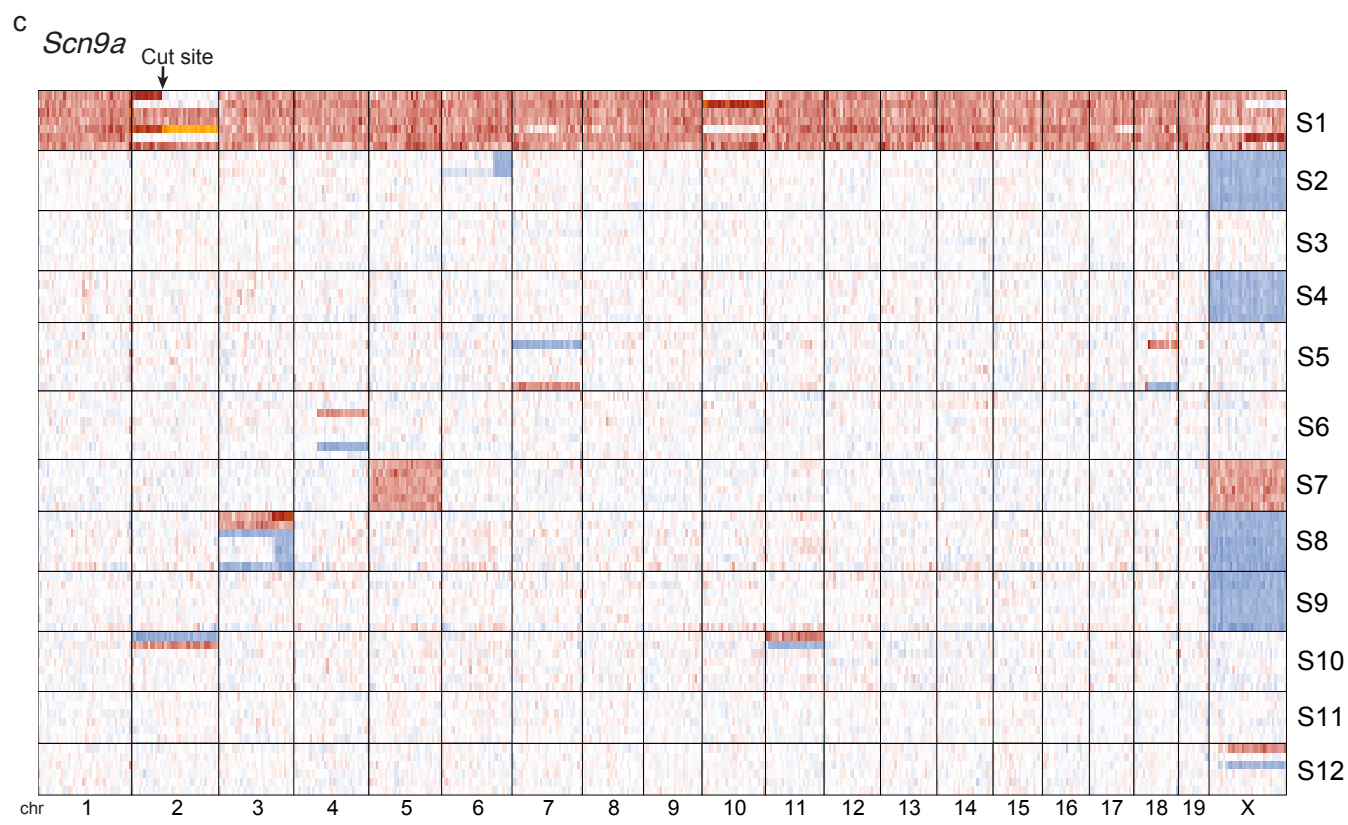

## **Supplementary Figure 1. Copy number profiles of the blastomeres from all 8-cell stage embryos**

Shown are CN heatmaps as in Fig. 1d for the indicated samples. Bin size: 5 Mb. Both male and female embryos were included in the analysis, as indicated by the chromosome X copy number profiles. The Y-chromosome is not shown because of limited mappable sequence. The S1 and P2 embryos are triploid, presumably due to whole genome duplication during oogenesis. For the sequencing metrics and description of the chromosomal events of each embryo see Supplementary Data 1. The blastomere samples are arranged as presented in the Supplementary Data 1, excluding those that do not pass the sequencing quality filters as described in Methods (for a full list of samples see Supplementary Data 1).

We detected segmental CN alterations of greater than 10 Mb size as well as whole-chromosome aneuploidies in 12.5% of the blastomeres in the untreated embryo group, 15.8% in the Pou5f1 and 25.6% in the Scn9a group (see also Supplementary Data 1).

**a** Supplementary Figure 2

| Embryo | Blastomere                 | Chromosome | Genomic location (Mb) |
|--------|----------------------------|------------|-----------------------|
| P6     | P6.4, P6.7                 | 9          | 108.5                 |
| P7     | P7.1, P7.5                 | 9          | 59.5                  |
| P7     | P7.1                       | 13         | 20.5                  |
| P7     | P7.5                       | 13         | 19.5                  |
| P8     | P8.4                       | 17         | 35.5                  |
| P8     | P8.6                       | 17         | 34.5                  |
| P9     | P9.2, P9.5                 | 17         | 34.5                  |
| P9     | P9.7                       | 17         | 35.5                  |
| P10    | P10.3                      | 4          | 109.5                 |
| P10    | P10.5                      | 4          | 110.5                 |
| P10    | P10.7                      | 17         | 12.5                  |
| P11    | P11.5                      | 1          | 34.5                  |
| P11    | P11.1, P11.2, P11.3, P11.6 | 8          | 43.5                  |
| S1     | S1.1                       | 2          | 65.5                  |
| S1     | S1.2                       | X          | 81.5                  |
| S1     | S1.6                       | 2          | 66.5                  |
| S1     | S1.7                       | X          | 80.5                  |
| S2     | S2.1, S2.2                 | 6          | 110.5                 |
| S2     | S2.3                       | 6          | 109.5                 |
| S5     | S5.3                       | 18         | 32.5                  |
| S5     | S5.8                       | 18         | 29.5                  |
| S8     | S8.1, S8.4, S8.5, S8.6     | 3          | 116.5                 |

**b**

*Pou5f1* gRNA sequence

ACCCACCAAAGAGAACGCCAGG

| Offtarget Sequence      | Mismatch Position | Mismatch Count | MIT Offtarget Score | CFD Offtarget Score | chromosome | start     | end       | strand | Notes                 |
|-------------------------|-------------------|----------------|---------------------|---------------------|------------|-----------|-----------|--------|-----------------------|
| ACCAACCAAAGAGAAGCTCAGG  | ...*.....*.*      | 3              | 0.17071642          | 0.38866397          | chr5       | 62822971  | 62822993  | -      | CRISPOR/CasOFF-finder |
| ACCAACCAAAGAGAAGCACAGG  | ...*.....*.*      | 3              | 0.17071642          | 0.36090226          | chr5       | 63467362  | 63467384  | +      | CRISPOR/CasOFF-finder |
| ACCAACCAAAGAGAAGCACAGG  | ...*.....*.*      | 3              | 0.17071642          | 0.36090226          | chrX       | 61708632  | 61708654  | -      | CRISPOR/CasOFF-finder |
| ACCAACCAAAGAGAAGCACAGG  | ...*.....*.*      | 3              | 0.17071642          | 0.36090226          | chr1       | 8605761   | 8605783   | +      | CRISPOR/CasOFF-finder |
| ACCCAGCAGAGAGAAGCCAGG   | .....**.....      | 3              | 0.17896778          | 0.33333333          | chr8       | 117951595 | 117951617 | -      | CRISPOR/CasOFF-finder |
| ACCAACCAAAGAGTACACACAGG | .....**.....      | 3              | 0.04384796          | 0.21333333          | chr11      | 13834429  | 13834451  | +      | CRISPOR/CasOFF-finder |
| ACCAACCAAAGAGCAAGCCAGG  | ...*.....*.*      | 3              | 0.07620219          | 0.18045113          | chr9       | 89145746  | 89145768  | +      | CRISPOR/CasOFF-finder |
| ACCAACCAAAGAGCAATCCAGG  | .....**.....      | 3              | 0.06700652          | 0.11764706          | chr4       | 4680084   | 4680106   | -      | CRISPOR/CasOFF-finder |
| ACCCAGCAAAGAGAACCCAGG   | ...*.....**..     | 3              | 0.11277021          | 0.11764706          | chrX       | 41813280  | 41813302  | -      | CRISPOR/CasOFF-finder |
| CCCCACCACAGAGAACCCTGG   | *.....*.....      | 3              | 0.78826543          | 0.1152461           | chr5       | 114028036 | 114028058 | +      | CRISPOR/CasOFF-finder |
| AGCCACCAATGAGAAGGCCCGG  | *.....*.....      | 3              | 0.49914229          | 0.09443242          | chr15      | 88819494  | 88819516  | -      | CRISPOR/CasOFF-finder |
| AACCACCAAAGAGAACGCATGGG | .....**.....      | 3              | 0.47000847          | 0.09350649          | chr9       | 90389717  | 90389739  | -      | CRISPOR/CasOFF-finder |
| ACCAACCAAAGAGACGCTTGG   | .....*.....*.*    | 3              | 0.2430216           | 0.08265306          | chr6       | 39017142  | 39017164  | +      | CRISPOR/CasOFF-finder |
| ACCAACCAAAGAGCAGCACAGG  | ...*.....*.*      | 3              | 0.14788806          | 0.0773362           | chrX       | 150434475 | 150434497 | +      | CRISPOR/CasOFF-finder |
| ACCAACCAAAGAGCAGCACAGG  | ...*.....*.*      | 3              | 0.14788806          | 0.0773362           | chr6       | 85167129  | 85167151  | +      | CRISPOR/CasOFF-finder |
| ACCAACCAAAGAGCAGCACAGG  | .....**.....      | 3              | 0.02288997          | 0.06153846          | chr10      | 121060566 | 121060588 | -      | CRISPOR/CasOFF-finder |
| ACCAACCAAAGAGCATGCCAGG  | ...*.....*.*      | 3              | 0.07620219          | 0.05552342          | chr12      | 13905999  | 13906021  | -      | CRISPOR/CasOFF-finder |
| ACCAACCAAAGAGCATGCCAGG  | ...*.....*.*      | 3              | 0.07620219          | 0.05552342          | chr10      | 102683748 | 102683770 | +      | CRISPOR/CasOFF-finder |
| ACCAACCAAAGAGAACTCCAG   | .....**.....      | 3              | 0.22895149          | 0.03929825          | chr6       | 99974344  | 99974366  | +      | CRISPOR               |
| AGACAGCAAAGAGAACGCCAGA  | **.....*.....     | 3              | 0.2895037           | 0.02093398          | chr18      | 37748618  | 37748640  | +      | CRISPOR               |

*Scn9a* gRNA sequence

ATGTGGATGTCAGTTTATAGAG

| Offtarget Sequence      | Mismatch Position | Mismatch Count | MIT Offtarget Score | CFD Offtarget Score | chromosome | start     | end       | strand | Notes                 |
|-------------------------|-------------------|----------------|---------------------|---------------------|------------|-----------|-----------|--------|-----------------------|
| ATGTGGTTGTCAGTTTATAGAAG | .....*.....       | 1              | 13.66               | 0.113425926         | chr17      | 45890918  | 45890940  | +      | CRISPOR               |
| AGGTAATGTCAGTTTATAGAG   | *..*.....         | 3              | 1.46807152          | 0.728               | chr19      | 25457169  | 25457191  | -      | CRISPOR/CasOFF-finder |
| ACCTGGATGTCAGTTTATAGTGG | **.....*.....     | 3              | 1.074082667         | 0.304311074         | chr1       | 96239792  | 96239814  | +      | CRISPOR/CasOFF-finder |
| ATGTAGAGGTCAGTTTATAGAG  | ...*.....*.*      | 3              | 1.034177215         | 0.190666667         | chr1       | 125222180 | 125222202 | +      | CRISPOR/CasOFF-finder |
| ATGTGTATGTCAGTTTATAGGG  | .....**.....      | 3              | 0.391104507         | 0.155555555         | chr1       | 86809333  | 86809355  | -      | CRISPOR/CasOFF-finder |
| ATATGTAAGTCAGTTTATAGAG  | ...*.....*.*      | 3              | 0.289503704         | 0.103703704         | chr19      | 4539524   | 4539546   | +      | CRISPOR               |
| ATGTGCATGTCAGTTTATAGTGG | .....**.....      | 3              | 0.420190723         | 0.056818182         | chr5       | 25161870  | 25161892  | +      | CRISPOR/CasOFF-finder |
| ATGTGTATGTCAGTTTATAGAG  | .....**.....      | 3              | 0.420190723         | 0.055555556         | chr1       | 126396727 | 126396749 | -      | CRISPOR/CasOFF-finder |
| ATGTGGCTGTCAGTTTCTATTGG | .....**.....      | 3              | 0.326039509         | 0.054044118         | chr5       | 133517284 | 133517306 | -      | CRISPOR/CasOFF-finder |
| ATGTGGAAGTCAGTTTGGAGG   | .....**.....      | 3              | 0.341366667         | 0.04                | chr9       | 45030427  | 45030449  | +      | CRISPOR/CasOFF-finder |
| AACTGGATGTCAGTTTGTAGAAG | **.....*.....     | 3              | 0.239223549         | 0.014889585         | chr3       | 11557800  | 11557822  | -      | CRISPOR               |
| ATGTAGATGTCAGTTTATAGTGG | ...*.....*.*      | 3              | 0.418675556         | 0.010833333         | chr10      | 64366158  | 64366180  | +      | CRISPOR/CasOFF-finder |
| ATATTGTTGTCAGTTTATAGGGA | ..*..*.....       | 3              | 0.326828148         | 0.006835937         | chr1       | 101430663 | 101430685 | -      | CRISPOR               |

**Supplementary Figure 2. Compendium of copy number breakpoints identified in the study and comparison to predicted off-target Cas9 cleavage**

- (a) Genomic locations of the sites where CN transitions were detected, indicating DNA breakpoints. Shown are the data for all the embryos sequenced to high depth (“NovaSeq”, see Supplementary Data 1). The blastomeres from which the breakpoints were detected are listed in the “samples” column. Note: the breakpoint sites in the sequenced embryos are approximate genomic locations identified by circular binary segmentation. We considered sites within 1 Mb as the same breakpoint event. None of the 1 Mb windows for chromosomal breakpoints were predicted to contain off-target sites for the gRNAs. Bold text indicates breakpoints associated with the on-target cut site of the respective gRNA. Source data are provided as a Source Data file.
- (b) List of off-target sites for *Pou5f1* and *Scn9a* gRNAs using CRISPOR and CasOff-finder. Only the off-target sites with less than three mismatches are shown. Cutting frequency determination (“CFD”) and the MIT specificity (“MIT”, from the CRISPR Design website; <http://crispr.mit.edu>) scores are shown, as described in Ref. 22.

**a**

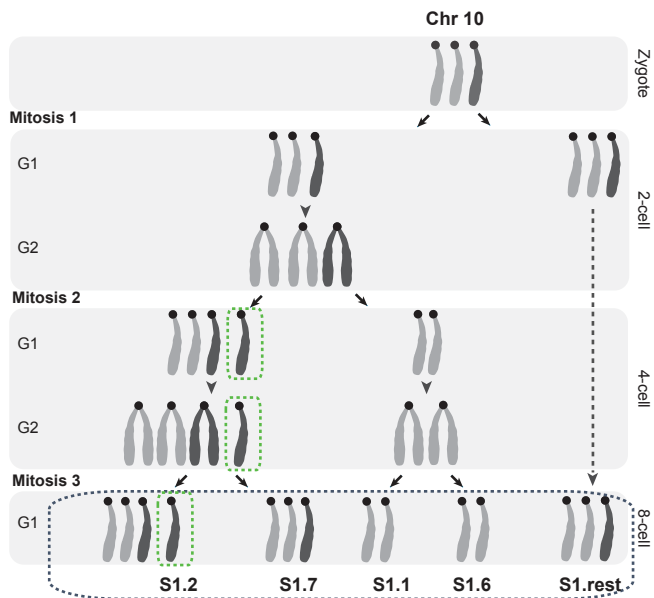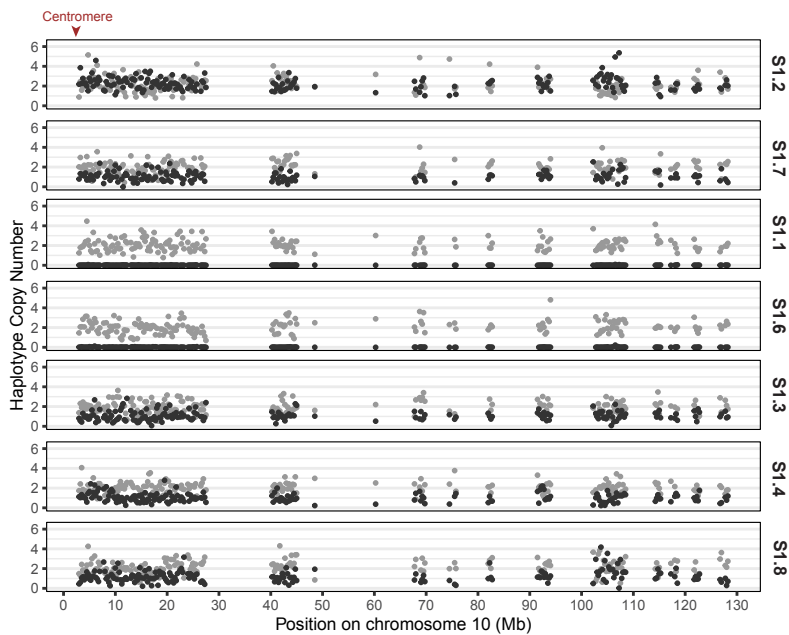

**b**

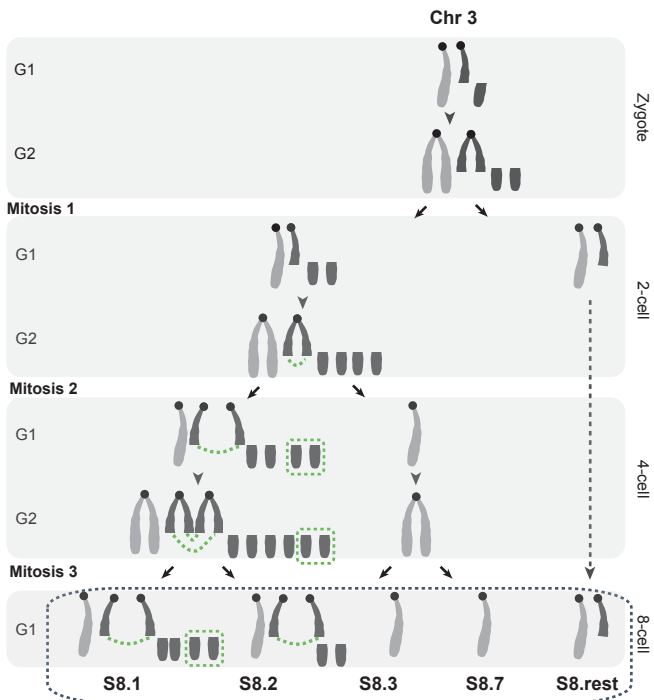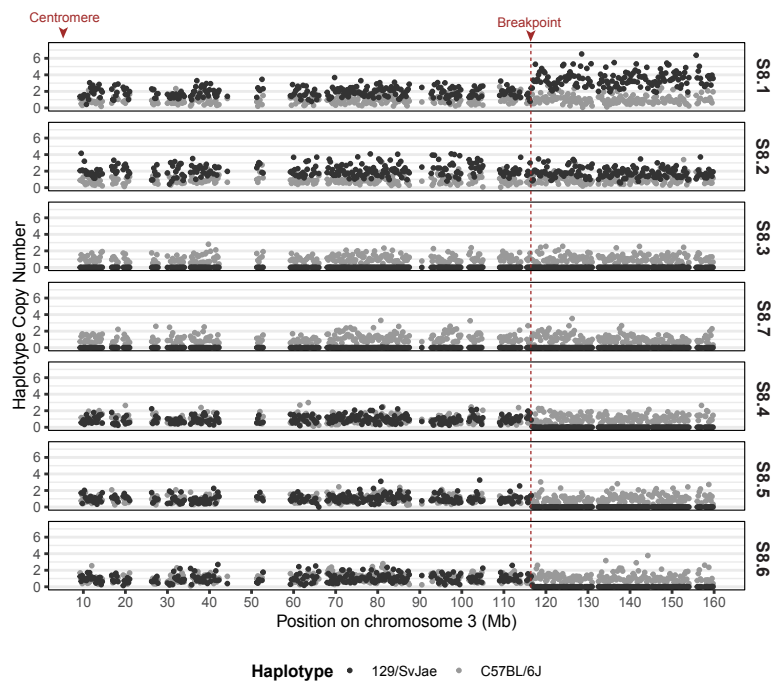

**Supplementary Figure 3. Spontaneous micronucleus formation in embryos, unrelated to on-target Cas9 cleavage**

(a) Left, scheme to explain the copy number (CN) pattern for blastomeres of the S1 embryo (*Scn9a* gRNA). In this example, a whole-chromosome containing micronucleus formed involving a different chromosome than the targeted chromosome. Right: haplotype CN scatter plots (see also Fig. 2c) for blastomeres from this embryo (250 kb bins) for the targeted chromosome. Labelling and color schemes as in Fig. 2.

(b) Left, scheme to explain the CN pattern for blastomeres of the S8 embryo (*Scn9a* gRNA). A break in chromosome 3 occurred at the zygote's G1 stage (or alternatively two independent cuts at the same locus of both sister chromatids at the G2) resulting in missegregation of both telomeric acentric fragments to the primary nucleus of one daughter cell. Based on the odd numbered DNA CN indicating underreplication, we infer that the micronucleus formed after Mitosis 2. In this scenario, a chromosome bridge explains the co-segregation of the centromeric segments to the same daughter. An alternative scenario explaining these CN profiles would require breakage of only one of the two sister chromatids before Mitosis 1 and a subsequent cut of one chromatid of the same haplotype at the next interphase. Right, CN plots as in (a). Labelling and color schemes as in Fig. 2.

Supplementary Figure 4

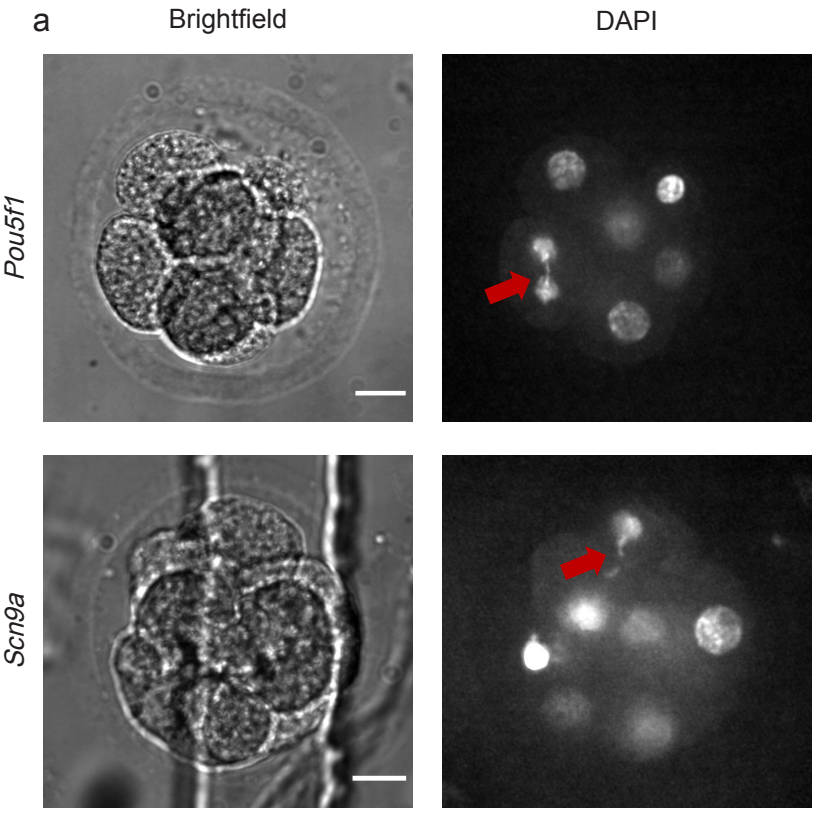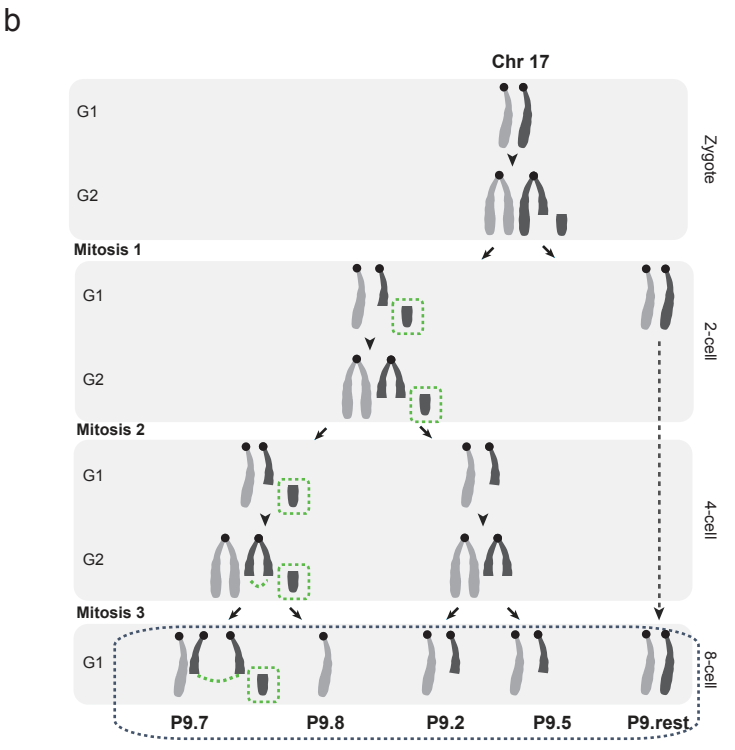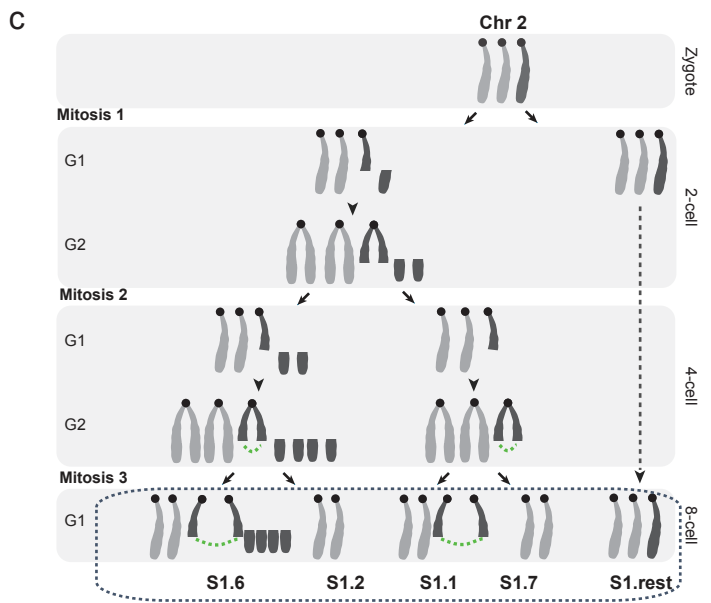

**Supplementary Figure 4. Alternative explanation for CN patterns in P9 and S1 embryos and example chromosome bridges in 8-cell embryos**

- (a) Cytological evidence of chromosome bridge formation in mouse embryos upon CRISPR-Cas9 treatment. Shown are maximum intensity projections from five z-focal plane confocal images of 8-cell stage mouse embryos after Cas9 treatment (top: *Pou5f1* gRNA; bottom: *Scn9a* gRNA. Red arrows: chromosome bridge. Scale bar: 15  $\mu$ m. We note that the limited detection sensitivity in 3D embryos preclude a definitive determination of their frequency, and these images were collected over a single experiment.
- (b) Alternative explanation for CN patterns seen in Fig. 2. In this scenario for the P9 embryo, one sister chromatid of one homologue is cut in a G2 zygote. The illustrated pattern of segregation would explain the observed CN pattern in this embryo (Fig. 2b), but unlike the scenario in Fig. 2b, the 8-cell blastomere would have been harvested in the G1 phase. Although we cannot exclude this model, we disfavor it because if Cas9 cuts in a G2 cell it is common for it to cleave both sisters<sup>6</sup>. Labelling and color schemes as in Fig. 2.
- (c) Alternative explanation for CN patterns seen in Fig. 2. In this scenario for the S1 embryo, instead of the chromosome bridge forming before Mitosis 2, both cells independently form bridges before Mitosis 3.

In all examples derived from on-target cleavage, the chromosomal missegregation events occurred as early as in the second (P9 and S1) or third mitosis (P8), suggesting that the CRISPR-Cas9 cut was introduced in the 2-cell cleavage stage, consistent with other studies<sup>2</sup>. It is likely that one homologue was cleaved in G1, and after DNA replication two acentric sister chromatid fragments segregated to one daughter.



Alternatively, but less likely, two independent cuts on each sister chromatid may have occurred in a G2 phase cell.

***Pou5f1***

| Blastomere | Embryo | Chromosome | # of SVs |
|------------|--------|------------|----------|
| P6.5       | P6     | chr16      | 1        |
| P7.1       | P7     | chr11      | 1        |
| P8.1       | P8     | chr4       | 1        |
| P8.1       | P8     | chr16      | 4        |
| P8.2       | P8     | chr4       | 1        |
| P8.4       | P8     | chr17      | 1        |
| P8.4       | P8     | chr18      | 1        |
| P8.7       | P8     | chr13      | 1        |
| P9.2       | P9     | chr2       | 1        |
| P9.2       | P9     | chr3       | 1        |
| P9.4       | P9     | chr13      | 1        |
| P9.4       | P9     | chr7       | 1        |
| P9.8       | P9     | chr6       | 1        |
| P10.1      | P10    | chr6       | 1        |
| P11.1      | P11    | chr8       | 1        |
| P11.2      | P11    | chr14      | 1        |
| P11.5      | P11    | chr10      | 1        |

***Scn9a***

| Blastomere | Embryo | Chromosome | # of SVs |
|------------|--------|------------|----------|
| S1.2       | S1     | chr9       | 1        |
| S1.2       | S1     | chr12      | 1        |
| S1.2       | S1     | chr16      | 1        |
| S1.2       | S1     | chr19      | 1        |
| S1.3       | S1     | chr2       | 1        |
| S1.6       | S1     | chr3       | 1        |
| S1.6       | S1     | chr18      | 1        |
| S1.7       | S1     | chr9       | 1        |
| S2.4       | S2     | chr9       | 1        |
| S2.5       | S2     | chr8       | 1        |
| S2.6       | S2     | chr10      | 1        |
| S5.3       | S5     | chr9       | 1        |
| S5.6       | S5     | chr4       | 1        |
| S5.7       | S5     | chr5       | 1        |
| S5.7       | S5     | chr7       | 1        |
| S5.7       | S5     | chr8       | 1        |
| S7.1       | S7     | chr7       | 1        |
| S7.1       | S7     | chr12      | 1        |
| S7.1       | S7     | chrX       | 1        |
| S7.3       | S7     | chr17      | 2        |
| S7.6       | S7     | chrX       | 1        |
| S8.7       | S8     | chr1       | 1        |
| S8.7       | S8     | chr9       | 1        |
| S10.1      | S10    | chr14      | 1        |
| S10.5      | S10    | chr1       | 1        |
| S10.6      | S10    | chr1       | 1        |
| S10.6      | S10    | chr7       | 1        |
| S10.6      | S10    | chr8       | 1        |
| S10.7      | S10    | chr3       | 1        |
| S10.7      | S10    | chr9       | 1        |

**Supplementary Figure 5. Absence of clustered rearrangements characteristic of chromothripsis in the analyzed embryos**

Lists of the number of structural variants (SVs) detected in the indicated blastomeres based on our SV analysis pipeline for single-cell whole genome sequencing data (the blastomeres that were sequenced to high depth are shown, “NovaSeq”, see Supplementary Data 1). Numbers are shown for chromosomes with at least one SV ( $n = 1800$  total chromosomes from 90 samples passing library quality control checks). We did not detect chromothripsis in any of the blastomeres sequenced. Source data are provided as a Source Data file.

## **Supplementary Data 1. Copy number analysis of sequenced embryo cells and description of chromosomal events**

List of all the blastomeres sequenced per embryo and sequencing quality assessment for both sequencing platforms used (HiSeq and NovaSeq). The filters applied to assess sequencing quality are described in Methods. A description of inferred chromosomal events for each embryo is presented in column “chromosomal events”.

Note: Presence of micronucleus is inferred based on the DNA replication status of the missegregated chromosomal segments. Cases showing defective DNA replication are considered as micronucleation events, however we cannot exclude the possibility that micronuclei with normal DNA replication were present in other cases of chromosome missegregation. NA: not applicable.

## **Supplementary Data 2. gRNA sequences**

List of the sequences and genomic coordinates of the gRNAs used in the study.
